# Supplementary material for: Rapid sympatric ecological differentiation of crater lake cichlid fishes within historic times
Source: PubMed Central journal article supplement (PMC2880021; doi:10.1186/1741-7007-8-60), 2010-05-12
Supplement: 1741-7007-8-60-S1.pdf [file 1741-7007-8-60-S1.pdf]

**Additional File 1: Genetic diversity.**

Microsatellite heterozygosity, the number of alleles, and the inbreeding coefficient by locus and lake.

| <b>Locus</b>    | <b>Observed Heterozygosity</b> | <b>Expected Heterozygosity</b> | <b>Number of Alleles</b> | <b><math>F_{IS}</math></b> |
|-----------------|--------------------------------|--------------------------------|--------------------------|----------------------------|
| <b>Apoyeque</b> |                                |                                |                          |                            |
| Abur82          | 0.553                          | 0.532                          | 4                        | -0.040                     |
| Abur151         | 0.719                          | 0.729                          | 6                        | 0.013                      |
| M1M             | 0.374                          | 0.396                          | 3                        | 0.057                      |
| M2              | 0.748                          | 0.724                          | 14                       | -0.034                     |
| M7              | 0.886                          | 0.858                          | 17                       | -0.033                     |
| TmoM7           | 0.328                          | 0.349                          | 5                        | 0.059                      |
| Burtkit         | 0.782                          | 0.688                          | 9                        | -0.137                     |
| M12             | 0.468                          | 0.423                          | 4                        | -0.107                     |
| Unh013          | 0.776                          | 0.778                          | 14                       | 0.002                      |
| Unh002          | 0.759                          | 0.722                          | 10                       | -0.052                     |
| Unh012          | 0.563                          | 0.675                          | 8                        | 0.166                      |
| mean            | 0.632                          | 0.625                          | 8.545                    | -0.010                     |
| st.dev          | 0.176                          | 0.163                          | 4.520                    | 0.080                      |
| <b>Xiloá</b>    |                                |                                |                          |                            |
| Abur82          | 0.380                          | 0.451                          | 6                        | 0.153                      |
| Abur151         | 0.816                          | 0.784                          | 8                        | -0.046                     |
| M1M             | 0.327                          | 0.348                          | 3                        | 0.058                      |
| M2              | 0.894                          | 0.876                          | 13                       | -0.026                     |
| M7              | 0.915                          | 0.894                          | 17                       | -0.029                     |
| TmoM7           | 0.765                          | 0.705                          | 5                        | -0.093                     |
| Burtkit         | 0.920                          | 0.837                          | 13                       | -0.105                     |
| M12             | 0.479                          | 0.567                          | 6                        | 0.151                      |
| Unh013          | 0.721                          | 0.844                          | 11                       | 0.142                      |
| Unh002          | 0.875                          | 0.868                          | 14                       | -0.013                     |
| Unh012          | 0.905                          | 0.795                          | 9                        | -0.146                     |
| mean            | 0.727                          | 0.725                          | 9.545                    | 0.004                      |
| st.dev          | 0.214                          | 0.178                          | 4.186                    | 0.102                      |

|         | <b>Managua</b> |       |        |        |
|---------|----------------|-------|--------|--------|
| Abur82  | 0.619          | 0.706 | 8      | 0.123  |
| Abur151 | 0.750          | 0.768 | 13     | 0.022  |
| M1M     | 0.584          | 0.567 | 6      | -0.030 |
| M2      | 0.940          | 0.919 | 19     | -0.025 |
| M7      | 0.905          | 0.923 | 23     | 0.018  |
| TmoM7   | 0.488          | 0.492 | 9      | 0.005  |
| Burtkit | 0.947          | 0.914 | 24     | -0.038 |
| M12     | 0.828          | 0.828 | 14     | -0.001 |
| Unh013  | 0.949          | 0.933 | 22     | -0.018 |
| Unh002  | 0.819          | 0.848 | 20     | 0.034  |
| Unh012  | 0.809          | 0.870 | 21     | 0.069  |
| mean    | 0.785          | 0.797 | 16.273 | 0.014  |
| st.dev  | 0.152          | 0.144 | 6.210  | 0.046  |

---
