# Supplementary material for: Rapid sympatric ecological differentiation of crater lake cichlid fishes within historic times
Source: PubMed Central journal article supplement (PMC2880021; doi:10.1186/1741-7007-8-60), 2010-05-12
Supplement: 1741-7007-8-60-S2.pdf [file 1741-7007-8-60-S2.pdf]

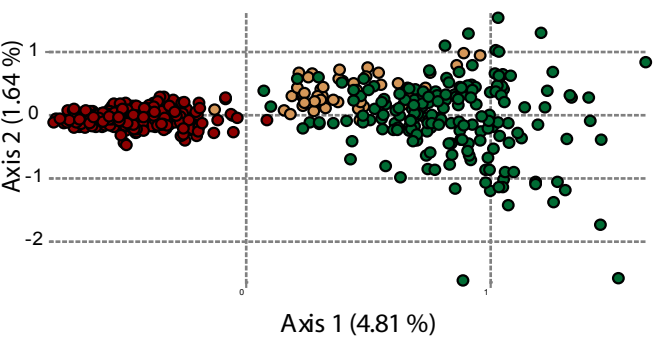

L. Apoyeque ●

L. Xiloá ●

L. Managua ●
