# Supplementary material for: Rapid sympatric ecological differentiation of crater lake cichlid fishes within historic times
Source: PubMed Central journal article supplement (PMC2880021; doi:10.1186/1741-7007-8-60), 2010-05-12
Supplement: 1741-7007-8-60-S3.pdf [file 1741-7007-8-60-S3.pdf]

### **Additional File 3: Population differentiation across lakes.**

Matrix of  $F_{ST}$ -values between each population pair: microsatellite differentiation is on the upper right and mtDNA differentiation is in the lower left of the matrix. Each lake is significantly genetically differentiated from the other.

|                 | <b>Apoyeque</b> | <b>Xiloá</b> | <b>Managua</b> |
|-----------------|-----------------|--------------|----------------|
| <b>Apoyeque</b> | -               | 0.141**      | 0.146**        |
| <b>Xiloá</b>    | 0.125*          | -            | 0.053**        |
| <b>Managua</b>  | 0.262**         | 0.072*       | -              |

(\*\*  $p < 0.001$ , \*  $p < 0.01$ ). Results are the same if populations are compared the other way around.
