# Supplementary material for: Rapid sympatric ecological differentiation of crater lake cichlid fishes within historic times
Source: PubMed Central journal article supplement (PMC2880021; doi:10.1186/1741-7007-8-60), 2010-05-12
Supplement: 1741-7007-8-60-S4.pdf [file 1741-7007-8-60-S4.pdf]

**Additional File 4: Maximal posterior probability peaks (HiPt) for three independent runs of IMA.**

Parameter  $q$  is the estimated effective population size of (1) Apoyeque, (2) Managua, and (a) the ancestral population, in numbers of individuals;  $m$  is the rate of migration from (1) Managua to Apoyeque and (2) Apoyeque to Managua in average number of migrations per 1000 generations per gene copy;  $t$  is the years since divergence between Apoyeque and Managua.

|       | $q1$ | $q2$ | $qa$  | $m1$ | $m2$ | $t$ |
|-------|------|------|-------|------|------|-----|
| Run 1 | 28   | 243  | 36108 | 8    | 0.2  | 89  |
| Run 2 | 39   | 2435 | 27258 | 12   | 0.3  | 63  |
| Run 3 | 7    | 290  | 29109 | 12   | 0.2  | 132 |
