# Supplementary material for: Rapid sympatric ecological differentiation of crater lake cichlid fishes within historic times
Source: PubMed Central journal article supplement (PMC2880021; doi:10.1186/1741-7007-8-60), 2010-05-12
Supplement: 1741-7007-8-60-S5.pdf [file 1741-7007-8-60-S5.pdf]

### Additional File 5: Specimen list

Specimens included in the analyses by lake of origin, species, specimen number, lip morph (L = thick-lipped, N = thin-lipped; only relevant for Apoyeque), and sex/maturity (F = adult female, M = adult male, J = juvenile, not noted = not noted or unassignable; only relevant for Apoyeque). Ecological and morphological analyses include: stable isotope analyses (SIA), diet or gut contents (gut), head width, lip and body size, and geometric morphometric analyses of body shape and pharyngeal jaw shape. Genetic data include mtDNA Genbank accession numbers, and whether the specimen was genotyped for microsatellite loci (x = genotyped).

| Lake     | Species                   | sample ID | lip | sex/ maturity | SIA | diet | width | shape | shape | lip & body size | Genbank  | Genotype |
|----------|---------------------------|-----------|-----|---------------|-----|------|-------|-------|-------|-----------------|----------|----------|
| Apoyeque | <i>A. cf. citrinellus</i> | AMCK00378 | L   | M             | SIA | gut  |       |       |       | x               |          | x        |
| Apoyeque | <i>A. cf. citrinellus</i> | AMCK00379 | N   | not noted     |     | gut  |       |       |       | x               | GU016704 | x        |
| Apoyeque | <i>A. cf. citrinellus</i> | AMCK00380 | N   | not noted     |     |      |       |       |       | x               | GU016705 | x        |
| Apoyeque | <i>A. cf. citrinellus</i> | AMCK00381 | N   | F             | SIA | gut  | head  | body  | jaw   | x               | GU016706 | x        |
| Apoyeque | <i>A. cf. citrinellus</i> | AMCK00382 | L   | not noted     | SIA | gut  |       |       |       | x               | GU016707 | x        |
| Apoyeque | <i>A. cf. citrinellus</i> | AMCK00383 | L   | not noted     | SIA | gut  |       |       |       | x               | GU016708 | x        |
| Apoyeque | <i>A. cf. citrinellus</i> | AMCK00384 | L   | F             | SIA | gut  | head  | body  | jaw   | x               | GU016709 | x        |
| Apoyeque | <i>A. cf. citrinellus</i> | AMCK00385 | L   | not noted     | SIA | gut  |       |       |       | x               | GU016710 | x        |
| Apoyeque | <i>A. cf. citrinellus</i> | AMCK00386 | N   | not noted     | SIA | gut  |       |       |       | x               | GU016711 | x        |
| Apoyeque | <i>A. cf. citrinellus</i> | AMCK00387 | N   | not noted     | SIA | gut  |       |       |       | x               | GU016712 |          |
| Apoyeque | <i>A. cf. citrinellus</i> | AMCK00388 | N   | not noted     | SIA |      |       |       |       | x               | GU016713 | x        |
| Apoyeque | <i>A. cf. citrinellus</i> | AMCK00389 | N   | not noted     |     |      |       |       |       | x               | GU016714 | x        |
| Apoyeque | <i>A. cf. citrinellus</i> | AMCK00390 | N   | M             |     |      |       |       |       | x               | GU016715 | x        |
| Apoyeque | <i>A. cf. citrinellus</i> | AMCK00391 | N   | not noted     |     |      |       |       |       | x               |          | x        |
| Apoyeque | <i>A. cf. citrinellus</i> | AMCK00392 | N   | not noted     |     |      |       |       |       | x               |          | x        |

|          |                           |           |   |           |     |     |      |      |     |   |          |   |
|----------|---------------------------|-----------|---|-----------|-----|-----|------|------|-----|---|----------|---|
| Apoyeque | <i>A. cf. citrinellus</i> | AMCK00393 | N | F         | SIA |     | head | body | jaw | x | GU016716 | x |
| Apoyeque | <i>A. cf. citrinellus</i> | AMCK00394 | N | not noted |     |     |      |      |     | x | GU016717 | x |
| Apoyeque | <i>A. cf. citrinellus</i> | AMCK00395 | N | M         | SIA | gut | head | body | jaw | x | GU016718 | x |
| Apoyeque | <i>A. cf. citrinellus</i> | AMCK00396 | N | M         | SIA |     | head | body | jaw | x | GU016719 | x |
| Apoyeque | <i>A. cf. citrinellus</i> | AMCK00397 | N | F         | SIA | gut | head | body | jaw |   | GU016720 | x |
| Apoyeque | <i>A. cf. citrinellus</i> | AMCK00398 | N | M         | SIA |     | head | body | jaw | x | GU016721 | x |
| Apoyeque | <i>A. cf. citrinellus</i> | AMCK00399 | N | not noted |     |     |      |      |     | x | GU016722 | x |
| Apoyeque | <i>A. cf. citrinellus</i> | AMCK00400 | N | not noted |     |     |      |      |     | x | GU016723 | x |
| Apoyeque | <i>A. cf. citrinellus</i> | AMCK00401 | N | F         | SIA | gut | head | body | jaw | x | GU016724 | x |
| Apoyeque | <i>A. cf. citrinellus</i> | AMCK00402 | N | not noted |     |     |      |      |     | x | GU016725 | x |
| Apoyeque | <i>A. cf. citrinellus</i> | AMCK00403 | N | F         | SIA |     |      |      |     | x | GU016726 | x |
| Apoyeque | <i>A. cf. citrinellus</i> | AMCK00404 | N | not noted |     |     |      |      |     |   | GU016727 | x |
| Apoyeque | <i>A. cf. citrinellus</i> | AMCK00405 | N | not noted |     |     |      |      |     | x | GU016728 | x |
| Apoyeque | <i>A. cf. citrinellus</i> | AMCK00406 | N | not noted |     |     |      |      |     | x | GU016729 | x |
| Apoyeque | <i>A. cf. citrinellus</i> | AMCK00407 | N | not noted |     |     |      |      |     | x | GU016730 | x |
| Apoyeque | <i>A. cf. citrinellus</i> | AMCK00408 | N | not noted |     |     |      |      |     | x | GU016731 | x |
| Apoyeque | <i>A. cf. citrinellus</i> | AMCK00409 | N | not noted |     |     |      |      |     | x | GU016732 | x |
| Apoyeque | <i>A. cf. citrinellus</i> | AMCK00410 | N | not noted |     |     |      |      |     | x | GU016733 | x |
| Apoyeque | <i>A. cf. citrinellus</i> | AMCK00411 | N | not noted |     |     |      |      |     | x | GU016734 | x |
| Apoyeque | <i>A. cf. citrinellus</i> | AMCK00412 | N | not noted |     |     |      |      |     | x | GU016735 | x |
| Apoyeque | <i>A. cf. citrinellus</i> | AMCK00413 | N | not noted |     |     |      |      |     | x | GU016736 | x |
| Apoyeque | <i>A. cf. citrinellus</i> | AMCK00414 | N | not noted |     |     |      |      |     | x | GU016737 | x |
| Apoyeque | <i>A. cf. citrinellus</i> | AMCK00415 | N | not noted |     |     |      |      |     | x | GU016738 | x |
| Apoyeque | <i>A. cf. citrinellus</i> | AMCK00416 | L | not noted |     |     |      |      |     | x | GU016739 | x |
| Apoyeque | <i>A. cf. citrinellus</i> | AMCK00417 | N | not noted |     |     |      |      |     | x | GU016740 | x |
| Apoyeque | <i>A. cf. citrinellus</i> | AMCK00418 | N | not noted |     |     |      |      |     | x | GU016741 | x |
| Apoyeque | <i>A. cf. citrinellus</i> | AMCK00419 | N | not noted | SIA | gut |      |      |     | x | GU016742 | x |
| Apoyeque | <i>A. cf. citrinellus</i> | AMCK00420 | N | not noted | SIA | gut |      |      |     | x | GU016743 | x |
| Apoyeque | <i>A. cf. citrinellus</i> | AMCK00421 | N | not noted | SIA |     |      |      |     | x | GU016744 | x |
| Apoyeque | <i>A. cf. citrinellus</i> | AMCK00422 | N | not noted |     |     |      |      |     | x | GU016745 | x |

|          |                           |           |   |           |     |   |          |   |
|----------|---------------------------|-----------|---|-----------|-----|---|----------|---|
| Apoyeque | <i>A. cf. citrinellus</i> | AMCK00423 | N | not noted |     | x | GU016746 | x |
| Apoyeque | <i>A. cf. citrinellus</i> | AMCK00424 | N | not noted |     | x | GU016747 | x |
| Apoyeque | <i>A. cf. citrinellus</i> | AMCK00425 | N | not noted |     | x | GU016748 | x |
| Apoyeque | <i>A. cf. citrinellus</i> | AMCK00426 | N | not noted |     | x | GU016749 | x |
| Apoyeque | <i>A. cf. citrinellus</i> | AMCK00427 | N | not noted | SIA | x | GU016750 | x |
| Apoyeque | <i>A. cf. citrinellus</i> | AMCK00428 | N | not noted |     | x | GU016751 | x |
| Apoyeque | <i>A. cf. citrinellus</i> | AMCK00429 | N | not noted |     | x | GU016752 | x |
| Apoyeque | <i>A. cf. citrinellus</i> | AMCK00430 | N | not noted |     | x | GU016753 | x |
| Apoyeque | <i>A. cf. citrinellus</i> | AMCK00431 | N | not noted |     | x | GU016754 | x |
| Apoyeque | <i>A. cf. citrinellus</i> | AMCK00432 | N | not noted |     | x | GU016755 | x |
| Apoyeque | <i>A. cf. citrinellus</i> | AMCK00433 | N | not noted |     | x | GU016756 | x |
| Apoyeque | <i>A. cf. citrinellus</i> | AMCK00434 | N | not noted |     | x | GU016757 | x |
| Apoyeque | <i>A. cf. citrinellus</i> | AMCK00435 | N | not noted |     | x | GU016758 | x |
| Apoyeque | <i>A. cf. citrinellus</i> | AMCK00436 | N | not noted |     | x | GU016759 | x |
| Apoyeque | <i>A. cf. citrinellus</i> | AMCK00437 | N | not noted |     | x | GU016760 | x |
| Apoyeque | <i>A. cf. citrinellus</i> | AMCK00438 | N | not noted |     | x | GU016761 | x |
| Apoyeque | <i>A. cf. citrinellus</i> | AMCK00439 | N | not noted |     | x | GU016762 | x |
| Apoyeque | <i>A. cf. citrinellus</i> | AMCK00440 | N | not noted |     | x | GU016763 | x |
| Apoyeque | <i>A. cf. citrinellus</i> | AMCK00441 | N | not noted |     | x | GU016764 | x |
| Apoyeque | <i>A. cf. citrinellus</i> | AMCK00442 | N | not noted |     | x | GU016765 | x |
| Apoyeque | <i>A. cf. citrinellus</i> | AMCK00443 | N | not noted |     | x | GU016766 | x |
| Apoyeque | <i>A. cf. citrinellus</i> | AMCK00444 | N | not noted |     | x | GU016767 | x |
| Apoyeque | <i>A. cf. citrinellus</i> | AMCK00445 | N | not noted |     | x | GU016768 | x |
| Apoyeque | <i>A. cf. citrinellus</i> | AMCK00446 | N | not noted |     | x | GU016769 | x |
| Apoyeque | <i>A. cf. citrinellus</i> | AMCK00447 | N | not noted |     | x | GU016770 | x |
| Apoyeque | <i>A. cf. citrinellus</i> | AMCK00448 | L | not noted |     | x | GU016771 | x |
| Apoyeque | <i>A. cf. citrinellus</i> | AMCK00449 | N | not noted |     | x | GU016772 | x |
| Apoyeque | <i>A. cf. citrinellus</i> | AMCK00450 | L | not noted |     | x | GU016773 | x |
| Apoyeque | <i>A. cf. citrinellus</i> | AMCK00451 | N | not noted |     | x | GU016774 | x |
| Apoyeque | <i>A. cf. citrinellus</i> | AMCK00452 | N | not noted |     | x | GU016775 | x |

|          |                           |           |   |           |     |      |      |     |   |          |   |
|----------|---------------------------|-----------|---|-----------|-----|------|------|-----|---|----------|---|
| Apoyeque | <i>A. cf. citrinellus</i> | AMCK00453 | N | not noted |     |      |      |     | x | GU016776 | x |
| Apoyeque | <i>A. cf. citrinellus</i> | AMCK00454 | N | not noted |     |      |      |     | x | GU016777 | x |
| Apoyeque | <i>A. cf. citrinellus</i> | AMCK00455 | N | not noted |     |      |      |     | x | GU016778 | x |
| Apoyeque | <i>A. cf. citrinellus</i> | AMCK00456 | N | not noted |     |      |      |     | x | GU016779 | x |
| Apoyeque | <i>A. cf. citrinellus</i> | AMCK00457 | N | F         | SIA |      |      |     | x | GU016780 | x |
| Apoyeque | <i>A. cf. citrinellus</i> | AMCK00458 | N | not noted |     |      |      |     | x | GU016781 | x |
| Apoyeque | <i>A. cf. citrinellus</i> | AMCK00580 | N | J         |     |      |      |     |   | GU016782 | x |
| Apoyeque | <i>A. cf. citrinellus</i> | AMCK00644 | N | M         |     | head | body | jaw | x | GU016783 | x |
| Apoyeque | <i>A. cf. citrinellus</i> | AMCK00645 | N | M         |     | head | body | jaw | x | GU016784 | x |
| Apoyeque | <i>A. cf. citrinellus</i> | AMCK00646 | L | J         |     |      |      |     | x | GU016785 | x |
| Apoyeque | <i>A. cf. citrinellus</i> | AMCK00647 | N | not noted |     |      |      |     | x | GU016786 | x |
| Apoyeque | <i>A. cf. citrinellus</i> | AMCK00648 | L | M         | SIA | head | body | jaw | x | GU016787 | x |
| Apoyeque | <i>A. cf. citrinellus</i> | AMCK00649 | N | J         |     |      |      |     | x | GU016788 | x |
| Apoyeque | <i>A. cf. citrinellus</i> | AMCK00650 | N | F         |     | head | body | jaw | x | GU016789 | x |
| Apoyeque | <i>A. cf. citrinellus</i> | AMCK00651 | N | M         |     | head | body | jaw | x |          |   |
| Apoyeque | <i>A. cf. citrinellus</i> | AMCK00652 | L | not noted | SIA |      |      |     | x |          |   |
| Apoyeque | <i>A. cf. citrinellus</i> | AMCK00653 | N | M         |     | head | body | jaw | x |          | x |
| Apoyeque | <i>A. cf. citrinellus</i> | AMCK00654 | N | F         |     | head | body | jaw | x | GU016790 | x |
| Apoyeque | <i>A. cf. citrinellus</i> | AMCK00655 | N | F         |     | head | body | jaw | x |          |   |
| Apoyeque | <i>A. cf. citrinellus</i> | AMCK00656 | N | F         |     | head | body | jaw | x | GU016791 | x |
| Apoyeque | <i>A. cf. citrinellus</i> | AMCK00657 | N | M         |     | head | body | jaw | x |          | x |
| Apoyeque | <i>A. cf. citrinellus</i> | AMCK00658 | N | F         |     | head | body | jaw | x |          | x |
| Apoyeque | <i>A. cf. citrinellus</i> | AMCK00659 | N | F         |     | head | body | jaw | x |          |   |
| Apoyeque | <i>A. cf. citrinellus</i> | AMCK00660 | N | F         |     | head | body | jaw | x |          | x |
| Apoyeque | <i>A. cf. citrinellus</i> | AMCK00661 | N | M         |     | head | body | jaw | x |          | x |
| Apoyeque | <i>A. cf. citrinellus</i> | AMCK00662 | L | M         |     | head | body | jaw | x |          |   |
| Apoyeque | <i>A. cf. citrinellus</i> | AMCK00663 | N | M         |     | head | body | jaw | x |          |   |
| Apoyeque | <i>A. cf. citrinellus</i> | AMCK00664 | L | M         | SIA | head | body | jaw | x |          | x |
| Apoyeque | <i>A. cf. citrinellus</i> | AMCK00665 | N | not noted |     |      |      |     | x |          | x |
| Apoyeque | <i>A. cf. citrinellus</i> | AMCK00666 | N | J         |     |      |      |     | x |          | x |
| Apoyeque | <i>A. cf. citrinellus</i> | AMCK00667 | N | F         |     | head | body | jaw | x |          | x |

|          |                           |           |   |           |     |      |      |      |     |          |   |
|----------|---------------------------|-----------|---|-----------|-----|------|------|------|-----|----------|---|
| Apoyeque | <i>A. cf. citrinellus</i> | AMCK00668 | N | M         |     | head | body | jaw  | x   |          | x |
| Apoyeque | <i>A. cf. citrinellus</i> | AMCK00669 | N | M         |     | head | body | jaw  | x   |          | x |
| Apoyeque | <i>A. cf. citrinellus</i> | AMCK00670 | N | not noted |     |      |      |      | x   |          |   |
| Apoyeque | <i>A. cf. citrinellus</i> | AMCK00671 | N | M         |     | head | body | jaw  | x   |          | x |
| Apoyeque | <i>A. cf. citrinellus</i> | AMCK00672 | N | F         |     | head | body | jaw  | x   |          | x |
| Apoyeque | <i>A. cf. citrinellus</i> | AMCK00673 | N | F         |     | head | body | jaw  | x   |          | x |
| Apoyeque | <i>A. cf. citrinellus</i> | AMCK00674 | N | M         |     | head | body | jaw  | x   |          | x |
| Apoyeque | <i>A. cf. citrinellus</i> | AMCK00675 | N | M         |     | head | body | jaw  | x   |          | x |
| Apoyeque | <i>A. cf. citrinellus</i> | AMCK00676 | N | not noted |     |      |      |      | x   | GU016792 | x |
| Apoyeque | <i>A. cf. citrinellus</i> | AMCK00677 | N | not noted |     |      |      |      | x   |          | x |
| Apoyeque | <i>A. cf. citrinellus</i> | AMCK00678 | L | not noted | SIA |      |      |      | x   | GU016793 | x |
| Apoyeque | <i>A. cf. citrinellus</i> | AMCK00679 | N | F         |     |      |      |      | x   |          | x |
| Apoyeque | <i>A. cf. citrinellus</i> | AMCK00680 | N | J         |     |      |      |      | x   |          | x |
| Apoyeque | <i>A. cf. citrinellus</i> | AMCK00681 | L | J         |     |      |      |      | x   |          | x |
| Apoyeque | <i>A. cf. citrinellus</i> | AMCK00682 | L | F         |     | head | body | jaw  | x   |          | x |
| Apoyeque | <i>A. cf. citrinellus</i> | AMCK00683 | N | M         |     | head | body | jaw  | x   |          | x |
| Apoyeque | <i>A. cf. citrinellus</i> | AMCK00684 | N | F         |     | head | body | jaw  | x   |          | x |
| Apoyeque | <i>A. cf. citrinellus</i> | AMCK00685 | N | F         | SIA | gut  |      |      | x   |          | x |
| Apoyeque | <i>A. cf. citrinellus</i> | AMCK00686 | N | M         | SIA | gut  | head | body | jaw | x        | x |
| Apoyeque | <i>A. cf. citrinellus</i> | AMCK00687 | N | M         |     | head | body | jaw  | x   |          | x |
| Apoyeque | <i>A. cf. citrinellus</i> | AMCK00688 | N | J         |     |      |      |      | x   | GU016794 | x |
| Apoyeque | <i>A. cf. citrinellus</i> | AMCK00689 | L | M         | SIA | head | body | jaw  | x   | GU016795 | x |
| Apoyeque | <i>A. cf. citrinellus</i> | AMCK00690 | N | F         | SIA | head | body | jaw  | x   |          | x |
| Apoyeque | <i>A. cf. citrinellus</i> | AMCK00691 | N | M         |     | head | body | jaw  | x   | GU016796 | x |
| Apoyeque | <i>A. cf. citrinellus</i> | AMCK00692 | N | M         |     |      |      |      | x   |          | x |
| Apoyeque | <i>A. cf. citrinellus</i> | AMCK00693 | N | F         |     | head | body | jaw  | x   | GU016797 | x |
| Apoyeque | <i>A. cf. citrinellus</i> | AMCK00694 | N | J         |     |      |      |      | x   | GU016798 | x |
| Apoyeque | <i>A. cf. citrinellus</i> | AMCK00695 | N | M         |     |      |      |      | x   |          | x |
| Apoyeque | <i>A. cf. citrinellus</i> | AMCK00696 | N | F         |     |      |      |      | x   |          | x |
| Apoyeque | <i>A. cf. citrinellus</i> | AMCK00697 | N | M         |     | head | body | jaw  | x   |          | x |
| Apoyeque | <i>A. cf. citrinellus</i> | AMCK00698 | L | M         |     | head | body | jaw  | x   |          | x |

|          |                           |           |   |           |     |      |      |     |   |          |   |
|----------|---------------------------|-----------|---|-----------|-----|------|------|-----|---|----------|---|
| Apoyeque | <i>A. cf. citrinellus</i> | AMCK00699 | N | M         |     | head | body | jaw | x |          | x |
| Apoyeque | <i>A. cf. citrinellus</i> | AMCK00700 | N | F         |     | head | body | jaw | x |          | x |
| Apoyeque | <i>A. cf. citrinellus</i> | AMCK00701 | N | J         |     |      |      |     | x |          | x |
| Apoyeque | <i>A. cf. citrinellus</i> | AMCK00702 | L | J         |     |      |      |     | x |          | x |
| Apoyeque | <i>A. cf. citrinellus</i> | AMCK00703 | N | J         |     |      |      |     |   |          | x |
| Apoyeque | <i>A. cf. citrinellus</i> | AMCK00704 | N | F         |     | head | body | jaw | x |          | x |
| Apoyeque | <i>A. cf. citrinellus</i> | AMCK00705 | N | M         |     | head | body | jaw | x |          | x |
| Apoyeque | <i>A. cf. citrinellus</i> | AMCK00706 | N | not noted |     |      |      |     | x |          | x |
| Apoyeque | <i>A. cf. citrinellus</i> | AMCK00707 | N | F         |     | head | body | jaw | x |          | x |
| Apoyeque | <i>A. cf. citrinellus</i> | AMCK00708 | L | F         |     | head | body | jaw | x |          | x |
| Apoyeque | <i>A. cf. citrinellus</i> | AMCK00709 | N | J         |     |      |      |     | x |          | x |
| Apoyeque | <i>A. cf. citrinellus</i> | AMCK00710 | L | J         |     |      |      |     | x |          | x |
| Apoyeque | <i>A. cf. citrinellus</i> | AMCK00711 | L | F         |     | head | body | jaw | x |          | x |
| Apoyeque | <i>A. cf. citrinellus</i> | AMCK00712 | N | F         |     | head | body | jaw | x |          | x |
| Apoyeque | <i>A. cf. citrinellus</i> | AMCK00713 | N | J         |     |      |      |     | x |          | x |
| Apoyeque | <i>A. cf. citrinellus</i> | AMCK00714 | N | F         |     | head | body | jaw | x |          | x |
| Apoyeque | <i>A. cf. citrinellus</i> | AMCK00715 | L | M         | SIA | head | body | jaw | x |          | x |
| Apoyeque | <i>A. cf. citrinellus</i> | AMCK00716 | N | F         |     | head | body | jaw | x |          | x |
| Apoyeque | <i>A. cf. citrinellus</i> | AMCK00717 | N | J         |     |      |      |     | x |          | x |
| Apoyeque | <i>A. cf. citrinellus</i> | AMCK00718 | L | M         |     | head | body | jaw | x |          | x |
| Apoyeque | <i>A. cf. citrinellus</i> | AMCK00719 | N | M         |     |      |      |     | x |          |   |
| Apoyeque | <i>A. cf. citrinellus</i> | AMCK00720 | N | F         |     | head | body | jaw | x |          | x |
| Apoyeque | <i>A. cf. citrinellus</i> | AMCK00721 | N | M         |     | head | body | jaw | x |          | x |
| Apoyeque | <i>A. cf. citrinellus</i> | AMCK00722 | N | not noted |     |      |      |     | x | GU016799 | x |
| Apoyeque | <i>A. cf. citrinellus</i> | AMCK00723 | N | F         |     | head | body | jaw | x |          | x |
| Apoyeque | <i>A. cf. citrinellus</i> | AMCK00724 | N | J         |     |      |      |     | x |          | x |
| Apoyeque | <i>A. cf. citrinellus</i> | AMCK00725 | N | J         |     |      |      |     | x |          | x |
| Apoyeque | <i>A. cf. citrinellus</i> | AMCK00726 | N | F         |     | head | body | jaw | x |          | x |
| Apoyeque | <i>A. cf. citrinellus</i> | AMCK00727 | N | M         |     | head | body | jaw | x |          | x |
| Apoyeque | <i>A. cf. citrinellus</i> | AMCK00728 | N | J         |     |      |      |     | x |          | x |

|          |                           |           |   |           |     |      |      |     |   |          |   |
|----------|---------------------------|-----------|---|-----------|-----|------|------|-----|---|----------|---|
| Apoyeque | <i>A. cf. citrinellus</i> | AMCK00729 | N | F         |     | head | body | jaw | x |          | x |
| Apoyeque | <i>A. cf. citrinellus</i> | AMCK00730 | N | F         |     |      |      |     | x |          | x |
| Apoyeque | <i>A. cf. citrinellus</i> | AMCK00731 | N | J         |     |      |      |     | x |          | x |
| Apoyeque | <i>A. cf. citrinellus</i> | AMCK00732 | N | M         |     | head | body | jaw | x |          | x |
| Apoyeque | <i>A. cf. citrinellus</i> | AMCK00733 | N | F         |     |      |      |     | x |          | x |
| Apoyeque | <i>A. cf. citrinellus</i> | AMCK00734 | L | F         |     |      |      |     | x |          | x |
| Apoyeque | <i>A. cf. citrinellus</i> | AMCK00735 | N | J         |     |      |      |     | x |          | x |
| Apoyeque | <i>A. cf. citrinellus</i> | AMCK00736 | N | J         |     |      |      |     | x |          | x |
| Apoyeque | <i>A. cf. citrinellus</i> | AMCK00737 | N | F         |     | head | body | jaw | x |          | x |
| Apoyeque | <i>A. cf. citrinellus</i> | AMCK00738 | N | M         |     | head | body | jaw | x |          | x |
| Apoyeque | <i>A. cf. citrinellus</i> | AMCK00739 | N | F         |     | head | body | jaw | x |          | x |
| Apoyeque | <i>A. cf. citrinellus</i> | AMCK00740 | L | M         | SIA | head | body | jaw | x |          | x |
| Apoyeque | <i>A. cf. citrinellus</i> | AMCK00741 | N | M         |     | head | body | jaw | x |          | x |
| Apoyeque | <i>A. cf. citrinellus</i> | AMCK00742 | N | M         |     |      |      |     | x |          | x |
| Apoyeque | <i>A. cf. citrinellus</i> | AMCK00743 | N | F         |     | head | body | jaw | x |          | x |
| Apoyeque | <i>A. cf. citrinellus</i> | AMCK00744 | N | F         |     |      |      |     | x |          | x |
| Apoyeque | <i>A. cf. citrinellus</i> | AMCK00745 | N | M         |     | head | body | jaw | x |          | x |
| Apoyeque | <i>A. cf. citrinellus</i> | AMCK00746 | N | M         |     | head | body | jaw | x |          | x |
| Apoyeque | <i>A. cf. citrinellus</i> | AMCK00747 | N | not noted |     |      |      |     | x |          | x |
| Apoyeque | <i>A. cf. citrinellus</i> | AMCK00748 | N | F         |     | head | body | jaw | x |          | x |
| Apoyeque | <i>A. cf. citrinellus</i> | AMCK00749 | N | not noted |     |      |      |     | x |          | x |
| Apoyeque | <i>A. cf. citrinellus</i> | AMCK00750 | N | M         |     | head | body | jaw | x |          | x |
| Apoyeque | <i>A. cf. citrinellus</i> | AMCK00751 | L | J         |     |      |      |     | x |          | x |
| Apoyeque | <i>A. cf. citrinellus</i> | AMCK00752 | N | F         |     | head | body | jaw | x |          | x |
| Apoyeque | <i>A. cf. citrinellus</i> | AMCK00753 | N | J         |     |      |      |     | x |          | x |
| Apoyeque | <i>A. cf. citrinellus</i> | AMCK00754 | N | M         |     | head | body | jaw | x |          | x |
| Apoyeque | <i>A. cf. citrinellus</i> | AMCK00755 | L | F         |     | head | body | jaw | x | GU016800 | x |
| Apoyeque | <i>A. cf. citrinellus</i> | AMCK00756 | N | J         |     |      |      |     | x | GU016801 | x |
| Apoyeque | <i>A. cf. citrinellus</i> | AMCK00757 | N | M         |     | head | body | jaw | x | GU016802 | x |
| Apoyeque | <i>A. cf. citrinellus</i> | AMCK00758 | N | F         |     | head | body | jaw | x | GU016803 | x |

|          |                           |           |   |           |     |      |      |     |   |          |   |
|----------|---------------------------|-----------|---|-----------|-----|------|------|-----|---|----------|---|
| Apoyeque | <i>A. cf. citrinellus</i> | AMCK00759 | N | F         |     |      |      |     | x | GU016804 | x |
| Apoyeque | <i>A. cf. citrinellus</i> | AMCK00760 | L | J         |     |      |      |     | x | GU016805 | x |
| Apoyeque | <i>A. cf. citrinellus</i> | AMCK00761 | L | J         |     |      |      |     | x | GU016806 | x |
| Apoyeque | <i>A. cf. citrinellus</i> | AMCK00762 | N | F         |     | head | body | jaw | x | GU016807 | x |
| Apoyeque | <i>A. cf. citrinellus</i> | AMCK00763 | N | F         |     | head | body | jaw | x | GU016808 | x |
| Apoyeque | <i>A. cf. citrinellus</i> | AMCK00764 | N | J         |     |      |      |     | x | GU016809 | x |
| Apoyeque | <i>A. cf. citrinellus</i> | AMCK00765 | L | J         |     |      |      |     | x | GU016810 | x |
| Apoyeque | <i>A. cf. citrinellus</i> | AMCK00766 | N | J         |     |      |      |     | x | GU016811 | x |
| Apoyeque | <i>A. cf. citrinellus</i> | AMCK00767 | N | M         |     | head | body | jaw | x | GU016812 | x |
| Apoyeque | <i>A. cf. citrinellus</i> | AMCK00768 | N | J         |     |      |      |     | x | GU016813 | x |
| Apoyeque | <i>A. cf. citrinellus</i> | AMCK00769 | N | not noted |     |      |      |     | x | GU016814 | x |
| Apoyeque | <i>A. cf. citrinellus</i> | AMCK00770 | L | J         |     |      |      |     | x | GU016815 | x |
| Apoyeque | <i>A. cf. citrinellus</i> | AMCK00771 | N | J         |     |      |      |     | x | GU016816 | x |
| Apoyeque | <i>A. cf. citrinellus</i> | AMCK00772 | N | J         |     |      |      |     | x |          | x |
| Apoyeque | <i>A. cf. citrinellus</i> | AMCK00773 | N | J         |     |      |      |     | x | GU016817 | x |
| Apoyeque | <i>A. cf. citrinellus</i> | AMCK00774 | N | F         |     |      |      |     | x | GU016818 | x |
| Apoyeque | <i>A. cf. citrinellus</i> | AMCK00775 | L | F         |     | head | body | jaw | x | GU016819 | x |
| Apoyeque | <i>A. cf. citrinellus</i> | AMCK00776 | L | J         |     |      |      |     | x | GU016820 | x |
| Apoyeque | <i>A. cf. citrinellus</i> | AMCK00777 | N | M         |     |      |      |     | x | GU016821 | x |
| Apoyeque | <i>A. cf. citrinellus</i> | AMCK00778 | N | J         |     |      |      |     | x | GU016822 | x |
| Apoyeque | <i>A. cf. citrinellus</i> | AMCK00779 | N | M         |     |      |      |     | x | GU016823 | x |
| Apoyeque | <i>A. cf. citrinellus</i> | AMCK00780 | N | F         |     |      |      |     | x | GU016824 | x |
| Apoyeque | <i>A. cf. citrinellus</i> | AMCK00781 | L | J         |     |      |      |     | x | GU016825 | x |
| Apoyeque | <i>A. cf. citrinellus</i> | AMCK00782 | L | M         | SIA | head | body | jaw | x | GU016826 | x |
| Apoyeque | <i>A. cf. citrinellus</i> | AMCK00783 | N | J         |     |      |      |     | x | GU016827 | x |
| Apoyeque | <i>A. cf. citrinellus</i> | AMCK00784 | L | J         |     |      |      |     | x | GU016828 | x |
| Apoyeque | <i>A. cf. citrinellus</i> | AMCK00785 | N | F         |     | head | body | jaw | x | GU016829 | x |
| Apoyeque | <i>A. cf. citrinellus</i> | AMCK00786 | N | J         |     |      |      |     | x | GU016830 | x |
| Apoyeque | <i>A. cf. citrinellus</i> | AMCK00787 | N | J         |     |      |      |     | x | GU016831 | x |
| Apoyeque | <i>A. cf. citrinellus</i> | AMCK00788 | N | J         |     |      |      |     | x | GU016832 | x |

|          |                           |           |   |           |     |      |      |     |   |          |   |
|----------|---------------------------|-----------|---|-----------|-----|------|------|-----|---|----------|---|
| Apoyeque | <i>A. cf. citrinellus</i> | AMCK00789 | N | M         |     |      |      |     | x | GU016833 | x |
| Apoyeque | <i>A. cf. citrinellus</i> | AMCK00790 | N | M         |     |      |      |     | x | GU016834 | x |
| Apoyeque | <i>A. cf. citrinellus</i> | AMCK00791 | N | not noted |     |      |      |     | x | GU016835 | x |
| Apoyeque | <i>A. cf. citrinellus</i> | AMCK00792 | N | not noted |     |      |      |     | x | GU016836 | x |
| Apoyeque | <i>A. cf. citrinellus</i> | AMCK00793 | N | not noted |     |      |      |     | x | GU016837 | x |
| Apoyeque | <i>A. cf. citrinellus</i> | AMCK00794 | N | J         |     |      |      |     | x | GU016838 | x |
| Apoyeque | <i>A. cf. citrinellus</i> | AMCK00795 | L | F         | SIA | head | body | jaw | x | GU016839 | x |
| Apoyeque | <i>A. cf. citrinellus</i> | AMCK00796 | L | J         |     |      |      |     | x | GU016840 | x |
| Apoyeque | <i>A. cf. citrinellus</i> | AMCK00797 | N | F         |     | head | body | jaw | x | GU016841 | x |
| Apoyeque | <i>A. cf. citrinellus</i> | AMCK00798 | N | M         |     |      |      |     | x | GU016842 | x |
| Apoyeque | <i>A. cf. citrinellus</i> | AMCK00799 | L | M         | SIA | head | body | jaw | x | GU016843 | x |
| Apoyeque | <i>A. cf. citrinellus</i> | AMCK00800 | N | F         |     | head | body | jaw | x | GU016844 | x |
| Apoyeque | <i>A. cf. citrinellus</i> | AMCK00801 | N | J         |     |      |      |     | x | GU016845 | x |
| Apoyeque | <i>A. cf. citrinellus</i> | AMCK00802 | N | F         |     | head | body | jaw | x | GU016846 | x |
| Apoyeque | <i>A. cf. citrinellus</i> | AMCK00803 | L | M         | SIA | head | body | jaw | x | GU016847 | x |
| Apoyeque | <i>A. cf. citrinellus</i> | AMCK00804 | N | F         |     | head | body | jaw | x | GU016848 | x |
| Apoyeque | <i>A. cf. citrinellus</i> | AMCK00805 | L | F         | SIA | head | body | jaw | x | GU016849 | x |
| Apoyeque | <i>A. cf. citrinellus</i> | AMCK00806 | L | F         |     | head | body | jaw | x | GU016850 | x |
| Apoyeque | <i>A. cf. citrinellus</i> | AMCK00807 | N | F         |     |      |      |     | x | GU016851 | x |
| Apoyeque | <i>A. cf. citrinellus</i> | AMCK00808 | N | J         |     |      |      |     | x | GU016852 | x |
| Apoyeque | <i>A. cf. citrinellus</i> | AMCK00809 | N | J         |     |      |      |     | x | GU016853 | x |
| Apoyeque | <i>A. cf. citrinellus</i> | AMCK00810 | L | J         |     |      |      |     | x | GU016854 | x |
| Apoyeque | <i>A. cf. citrinellus</i> | AMCK00811 | N | F         |     | head | body | jaw | x | GU016855 | x |
| Apoyeque | <i>A. cf. citrinellus</i> | AMCK00812 | N | M         |     | head | body | jaw | x | GU016856 | x |
| Apoyeque | <i>A. cf. citrinellus</i> | AMCK00813 | N | M         |     |      |      |     | x | GU016857 | x |
| Apoyeque | <i>A. cf. citrinellus</i> | AMCK00814 | N | F         |     |      |      |     | x | GU016858 | x |
| Apoyeque | <i>A. cf. citrinellus</i> | AMCK00815 | N | M         |     | head | body | jaw | x | GU016859 | x |
| Apoyeque | <i>A. cf. citrinellus</i> | AMCK00816 | N | J         |     |      |      |     | x | GU016860 | x |
| Apoyeque | <i>A. cf. citrinellus</i> | AMCK00817 | N | J         |     |      |      |     | x | GU016861 | x |
| Apoyeque | <i>A. cf. citrinellus</i> | AMCK00818 | N | not noted |     |      |      |     | x | GU016862 | x |

|          |                           |           |   |           |     |      |      |      |     |          |          |   |
|----------|---------------------------|-----------|---|-----------|-----|------|------|------|-----|----------|----------|---|
| Apoyeque | <i>A. cf. citrinellus</i> | AMCK00819 | N | F         |     | head | body | jaw  | x   |          | x        |   |
| Apoyeque | <i>A. cf. citrinellus</i> | AMCK00820 | N | J         |     |      |      |      | x   | GU016863 | x        |   |
| Apoyeque | <i>A. cf. citrinellus</i> | AMCK00821 | L | not noted |     |      |      |      | x   |          | x        |   |
| Apoyeque | <i>A. cf. citrinellus</i> | AMCK00822 | N | J         |     |      |      |      | x   | GU016864 | x        |   |
| Apoyeque | <i>A. cf. citrinellus</i> | AMCK00823 | N | M         |     |      |      |      | x   | GU016865 | x        |   |
| Apoyeque | <i>A. cf. citrinellus</i> | AMCK00824 | N | M         |     | head | body | jaw  | x   | GU016866 | x        |   |
| Apoyeque | <i>A. cf. citrinellus</i> | AMCK00825 | N | F         |     | head | body | jaw  | x   | GU016867 | x        |   |
| Apoyeque | <i>A. cf. citrinellus</i> | AMCK00826 | N | M         |     | head | body | jaw  | x   | GU016868 | x        |   |
| Apoyeque | <i>A. cf. citrinellus</i> | AMCK00827 | L | F         |     | head | body | jaw  | x   |          | x        |   |
| Apoyeque | <i>A. cf. citrinellus</i> | AMCK00828 | N | M         |     |      |      |      | x   |          | x        |   |
| Apoyeque | <i>A. cf. citrinellus</i> | AMCK00931 | L | F         | SIA | gut  |      |      |     | GU016869 | x        |   |
| Apoyeque | <i>A. cf. citrinellus</i> | AMCK00932 | N | not noted |     |      |      |      |     | GU016870 | x        |   |
| Apoyeque | <i>A. cf. citrinellus</i> | AMCK00933 | L | not noted | SIA |      |      |      |     | GU016871 | x        |   |
| Apoyeque | <i>A. cf. citrinellus</i> | AMCK00934 | N | F         |     |      |      |      |     | GU016872 | x        |   |
| Apoyeque | <i>A. cf. citrinellus</i> | AMCK00935 | L | J         |     |      |      |      |     | GU016873 | x        |   |
| Apoyeque | <i>A. cf. citrinellus</i> | AMCK00936 | N | F         |     |      |      |      |     | GU016874 | x        |   |
| Apoyeque | <i>A. cf. citrinellus</i> | AMCK00937 | L | F         | SIA | gut  |      |      |     | GU016875 | x        |   |
| Apoyeque | <i>A. cf. citrinellus</i> | AMCK00938 | N | M         |     |      |      |      |     | GU016876 | x        |   |
| Apoyeque | <i>A. cf. citrinellus</i> | AMCK00939 | L | F         | SIA | gut  |      |      |     | GU016877 | x        |   |
| Apoyeque | <i>A. cf. citrinellus</i> | AMCK00940 | N | F         | SIA | gut  | head | body | jaw | x        | GU016878 | x |
| Apoyeque | <i>A. cf. citrinellus</i> | AMCK00941 | N | J         |     |      |      |      | x   | GU016879 | x        |   |
| Apoyeque | <i>A. cf. citrinellus</i> | AMCK00942 | N | M         | SIA |      | head | body | jaw | x        | GU016880 | x |
| Apoyeque | <i>A. cf. citrinellus</i> | AMCK00943 | N | M         | SIA | gut  | head | body | jaw | x        | GU016881 | x |
| Apoyeque | <i>A. cf. citrinellus</i> | AMCK00944 | N | M         |     | gut  | head | body | jaw | x        | GU016882 | x |
| Apoyeque | <i>A. cf. citrinellus</i> | AMCK00945 | L | M         |     | gut  |      |      | x   | GU016883 | x        |   |
| Apoyeque | <i>A. cf. citrinellus</i> | AMCK00946 | N | J         |     |      |      |      | x   | GU016884 | x        |   |
| Apoyeque | <i>A. cf. citrinellus</i> | AMCK00947 | L | F         | SIA | gut  | head | body | jaw | x        | GU016885 | x |
| Apoyeque | <i>A. cf. citrinellus</i> | AMCK00948 | L | F         |     | gut  | head | body | jaw | x        | GU016886 | x |
| Apoyeque | <i>A. cf. citrinellus</i> | AMCK00949 | N | M         |     | gut  | head | body | jaw | x        | GU016887 | x |
| Apoyeque | <i>A. cf. citrinellus</i> | AMCK00950 | L | F         |     | gut  | head | body | jaw | x        | GU016888 | x |

|          |                           |           |   |           |     |     |      |      |     |   |          |   |
|----------|---------------------------|-----------|---|-----------|-----|-----|------|------|-----|---|----------|---|
| Apoyeque | <i>A. cf. citrinellus</i> | AMCK00951 | L | M         |     |     | head | body | jaw | x | GU016889 | x |
| Apoyeque | <i>A. cf. citrinellus</i> | AMCK00952 | L | not noted |     | gut |      |      |     | x | GU016890 | x |
| Apoyeque | <i>A. cf. citrinellus</i> | AMCK00953 | N | F         |     |     | head | body | jaw | x | GU016891 | x |
| Apoyeque | <i>A. cf. citrinellus</i> | AMCK00954 | L | F         | SIA |     | head | body | jaw | x | GU016892 | x |
| Apoyeque | <i>A. cf. citrinellus</i> | AMCK00955 | L | not noted | SIA | gut |      |      |     | x | GU016893 | x |
| Apoyeque | <i>A. cf. citrinellus</i> | AMCK00956 | N | M         | SIA | gut | head | body | jaw | x | GU016894 | x |
| Apoyeque | <i>A. cf. citrinellus</i> | AMCK00957 | N | F         | SIA |     | head | body | jaw | x | GU016895 | x |
| Apoyeque | <i>A. cf. citrinellus</i> | AMCK00958 | N | M         | SIA | gut | head | body | jaw | x | GU016896 | x |
| Apoyeque | <i>A. cf. citrinellus</i> | AMCK00959 | N | F         | SIA |     | head | body | jaw | x | GU016897 | x |
| Apoyeque | <i>A. cf. citrinellus</i> | AMCK00960 | N | F         |     |     | head | body | jaw | x | GU016898 | x |
| Apoyeque | <i>A. cf. citrinellus</i> | AMCK00961 | N | M         |     |     | head | body | jaw | x | GU016899 | x |
| Apoyeque | <i>A. cf. citrinellus</i> | AMCK00962 | N | M         | SIA | gut | head | body | jaw | x | GU016900 | x |
| Apoyeque | <i>A. cf. citrinellus</i> | AMCK00963 | N | M         | SIA | gut | head | body | jaw | x | GU016901 | x |
| Apoyeque | <i>A. cf. citrinellus</i> | AMCK00964 | N | J         |     |     |      |      |     | x | GU016902 | x |
| Apoyeque | <i>A. cf. citrinellus</i> | AMCK00965 | L | F         | SIA | gut | head | body | jaw | x | GU016903 | x |
| Apoyeque | <i>A. cf. citrinellus</i> | AMCK00966 | L | J         |     |     |      |      |     | x | GU016904 | x |
| Apoyeque | <i>A. cf. citrinellus</i> | AMCK00967 | N | not noted |     |     |      |      |     | x | GU016905 | x |
| Apoyeque | <i>A. cf. citrinellus</i> | AMCK00968 | N | F         |     |     | head | body | jaw | x | GU016906 | x |
| Apoyeque | <i>A. cf. citrinellus</i> | AMCK00969 | N | M         |     |     | head | body | jaw | x | GU016907 | x |
| Apoyeque | <i>A. cf. citrinellus</i> | AMCK00970 | N | M         |     |     | head | body | jaw | x | GU016908 | x |
| Apoyeque | <i>A. cf. citrinellus</i> | AMCK00971 | N | J         |     |     |      |      |     | x |          | x |
| Apoyeque | <i>A. cf. citrinellus</i> | AMCK00972 | N | M         |     |     | head | body | jaw | x | GU016909 | x |
| Apoyeque | <i>A. cf. citrinellus</i> | AMCK00973 | L | not noted | SIA | gut |      |      |     | x | GU016910 | x |
| Apoyeque | <i>A. cf. citrinellus</i> | AMCK00974 | N | not noted |     | gut |      |      |     | x | GU016911 | x |
| Apoyeque | <i>A. cf. citrinellus</i> | AMCK00975 | N | J         |     |     |      |      |     | x | GU016912 | x |
| Apoyeque | <i>A. cf. citrinellus</i> | AMCK00976 | N | M         |     |     | head | body | jaw | x | GU016913 | x |
| Apoyeque | <i>A. cf. citrinellus</i> | AMCK00977 | N | J         |     |     |      |      |     | x | GU016914 | x |
| Apoyeque | <i>A. cf. citrinellus</i> | AMCK00978 | L | J         |     |     |      |      |     | x | GU016915 | x |
| Apoyeque | <i>A. cf. citrinellus</i> | AMCK00979 | N | F         |     |     | head | body | jaw | x |          | x |
| Apoyeque | <i>A. cf. citrinellus</i> | AMCK00980 | L | F         | SIA |     | head | body | jaw | x | GU016916 | x |

|          |                           |           |   |           |     |      |      |      |     |          |          |   |
|----------|---------------------------|-----------|---|-----------|-----|------|------|------|-----|----------|----------|---|
| Apoyeque | <i>A. cf. citrinellus</i> | AMCK00981 | N | F         | SIA | head | body | jaw  | x   | GU016917 | x        |   |
| Apoyeque | <i>A. cf. citrinellus</i> | AMCK00982 | N | M         |     | head | body | jaw  | x   | GU016918 | x        |   |
| Apoyeque | <i>A. cf. citrinellus</i> | AMCK00983 | N | not noted |     |      |      |      | x   | GU016919 | x        |   |
| Apoyeque | <i>A. cf. citrinellus</i> | AMCK00984 | N | M         |     | head | body | jaw  | x   | GU016920 | x        |   |
| Apoyeque | <i>A. cf. citrinellus</i> | AMCK00985 | N | M         |     | head | body | jaw  | x   | GU016921 | x        |   |
| Apoyeque | <i>A. cf. citrinellus</i> | AMCK00986 | N | M         |     | gut  | head | body | jaw | x        | GU016922 | x |
| Apoyeque | <i>A. cf. citrinellus</i> | AMCK00987 | N | J         |     |      |      |      | x   | GU016923 | x        |   |
| Apoyeque | <i>A. cf. citrinellus</i> | AMCK00988 | N | M         |     | gut  | head | body | jaw | x        | GU016924 | x |
| Apoyeque | <i>A. cf. citrinellus</i> | AMCK00989 | N | J         |     |      |      |      | x   | GU016925 | x        |   |
| Apoyeque | <i>A. cf. citrinellus</i> | AMCK00990 | N | M         |     | head | body | jaw  | x   | GU016926 | x        |   |
| Apoyeque | <i>A. cf. citrinellus</i> | AMCK00991 | N | J         |     |      |      |      | x   | GU016927 | x        |   |
| Apoyeque | <i>A. cf. citrinellus</i> | AMCK00992 | L | not noted |     | gut  |      |      | x   | GU016928 | x        |   |
| Apoyeque | <i>A. cf. citrinellus</i> | AMCK00993 | N | F         |     | head | body | jaw  | x   | GU016929 | x        |   |
| Apoyeque | <i>A. cf. citrinellus</i> | AMCK00994 | N | M         |     | head | body | jaw  | x   | GU016930 | x        |   |
| Apoyeque | <i>A. cf. citrinellus</i> | AMCK00995 | N | J         |     |      |      |      | x   | GU016931 | x        |   |
| Apoyeque | <i>A. cf. citrinellus</i> | AMCK00996 | N | M         |     |      |      |      | x   | GU016932 | x        |   |
| Apoyeque | <i>A. cf. citrinellus</i> | AMCK00997 | N | M         |     | head | body | jaw  | x   | GU016933 | x        |   |
| Apoyeque | <i>A. cf. citrinellus</i> | AMCK00998 | N | J         |     |      |      |      | x   | GU016934 | x        |   |
| Apoyeque | <i>A. cf. citrinellus</i> | AMCK00999 | L | J         |     |      |      |      | x   | GU016935 | x        |   |
| Apoyeque | <i>A. cf. citrinellus</i> | AMCK01000 | N | M         | SIA | head | body | jaw  | x   | GU016936 | x        |   |
| Apoyeque | <i>A. cf. citrinellus</i> | AMCK01001 | N | J         |     |      |      |      | x   | GU016937 | x        |   |
| Apoyeque | <i>A. cf. citrinellus</i> | AMCK01002 | N | F         |     |      |      |      | x   | GU016938 | x        |   |
| Apoyeque | <i>A. cf. citrinellus</i> | AMCK01003 | N | J         |     |      |      |      | x   | GU016939 | x        |   |
| Apoyeque | <i>A. cf. citrinellus</i> | AMCK01004 | N | J         |     |      |      |      | x   | GU016940 | x        |   |
| Apoyeque | <i>A. cf. citrinellus</i> | AMCK01005 | L | F         | SIA | gut  | head | body | jaw | x        | GU016941 | x |
| Apoyeque | <i>A. cf. citrinellus</i> | AMCK01006 | N | J         |     |      |      |      | x   | GU016942 | x        |   |
| Apoyeque | <i>A. cf. citrinellus</i> | AMCK01007 | N | J         |     |      |      |      | x   | GU016943 | x        |   |
| Apoyeque | <i>A. cf. citrinellus</i> | AMCK01008 | N | F         |     | head | body | jaw  | x   | GU016944 | x        |   |
| Apoyeque | <i>A. cf. citrinellus</i> | AMCK01009 | N | J         |     |      |      |      | x   | GU016945 | x        |   |
| Apoyeque | <i>A. cf. citrinellus</i> | AMCK01010 | N | F         |     | head | body | jaw  | x   | GU016946 | x        |   |

|          |                           |           |   |           |     |      |      |      |     |          |          |   |
|----------|---------------------------|-----------|---|-----------|-----|------|------|------|-----|----------|----------|---|
| Apoyeque | <i>A. cf. citrinellus</i> | AMCK01011 | N | F         |     |      |      |      | x   | GU016947 | x        |   |
| Apoyeque | <i>A. cf. citrinellus</i> | AMCK01012 | N | not noted |     |      |      |      | x   | GU016948 | x        |   |
| Apoyeque | <i>A. cf. citrinellus</i> | AMCK01013 | N | J         |     |      |      |      | x   | GU016949 | x        |   |
| Apoyeque | <i>A. cf. citrinellus</i> | AMCK01014 | L | F         |     | head | body | jaw  | x   | GU016950 | x        |   |
| Apoyeque | <i>A. cf. citrinellus</i> | AMCK01015 | L | not noted |     |      |      |      | x   | GU016951 | x        |   |
| Apoyeque | <i>A. cf. citrinellus</i> | AMCK01016 | N | M         |     | head | body | jaw  | x   | GU016952 | x        |   |
| Apoyeque | <i>A. cf. citrinellus</i> | AMCK01017 | N | M         |     | head | body | jaw  | x   | GU016953 | x        |   |
| Apoyeque | <i>A. cf. citrinellus</i> | AMCK01018 | N | F         |     | head | body | jaw  | x   | GU016954 | x        |   |
| Apoyeque | <i>A. cf. citrinellus</i> | AMCK01019 | N | F         |     | head | body | jaw  | x   | GU016955 | x        |   |
| Apoyeque | <i>A. cf. citrinellus</i> | AMCK01020 | L | F         | SIA | gut  | head | body | jaw | x        | GU016956 | x |
| Apoyeque | <i>A. cf. citrinellus</i> | AMCK01021 | N | J         |     |      |      |      | x   | GU016957 | x        |   |
| Apoyeque | <i>A. cf. citrinellus</i> | AMCK01022 | N | J         |     |      |      |      | x   | GU016958 | x        |   |
| Apoyeque | <i>A. cf. citrinellus</i> | AMCK01023 | L | M         |     | head | body | jaw  | x   | GU016959 | x        |   |
| Apoyeque | <i>A. cf. citrinellus</i> | AMCK01024 | N | J         |     |      |      |      | x   | GU016960 | x        |   |
| Apoyeque | <i>A. cf. citrinellus</i> | AMCK01025 | N | F         |     | head | body | jaw  | x   | GU016961 | x        |   |
| Apoyeque | <i>A. cf. citrinellus</i> | AMCK01026 | N | F         |     | head | body | jaw  | x   | GU016962 | x        |   |
| Apoyeque | <i>A. cf. citrinellus</i> | AMCK01027 | N | M         |     | head | body | jaw  | x   | GU016963 | x        |   |
| Apoyeque | <i>A. cf. citrinellus</i> | AMCK01028 | N | M         |     |      |      |      | x   | GU016964 | x        |   |
| Apoyeque | <i>A. cf. citrinellus</i> | AMCK01029 | N | F         |     | head | body | jaw  |     | GU016965 | x        |   |
| Apoyeque | <i>A. cf. citrinellus</i> | AMCK01030 | N | M         | SIA | head | body | jaw  | x   | GU016966 | x        |   |
| Apoyeque | <i>A. cf. citrinellus</i> | AMCK01031 | N | F         |     |      |      |      | x   | GU016967 | x        |   |
| Apoyeque | <i>A. cf. citrinellus</i> | AMCK01032 | N | F         |     | head | body | jaw  | x   | GU016968 | x        |   |
| Apoyeque | <i>A. cf. citrinellus</i> | AMCK01033 | L | F         |     | head | body | jaw  | x   | GU016969 | x        |   |
| Apoyeque | <i>A. cf. citrinellus</i> | AMCK01034 | N | F         |     |      |      |      | x   | GU016970 | x        |   |
| Apoyeque | <i>A. cf. citrinellus</i> | AMCK01035 | N | M         |     | head | body | jaw  | x   | GU016971 | x        |   |
| Apoyeque | <i>A. cf. citrinellus</i> | AMCK01036 | N | F         |     | head | body | jaw  | x   | GU016972 | x        |   |
| Apoyeque | <i>A. cf. citrinellus</i> | AMCK01037 | N | F         |     | head | body | jaw  | x   | GU016973 | x        |   |
| Apoyeque | <i>A. cf. citrinellus</i> | AMCK01038 | N | F         |     | head | body | jaw  | x   | GU016974 | x        |   |
| Apoyeque | <i>A. cf. citrinellus</i> | AMCK01039 | L | F         |     | head | body | jaw  | x   | GU016975 | x        |   |
| Apoyeque | <i>A. cf. citrinellus</i> | AMCK01040 | N | M         |     | head | body | jaw  | x   | GU016976 | x        |   |

|          |                           |           |   |           |      |      |     |   |          |   |
|----------|---------------------------|-----------|---|-----------|------|------|-----|---|----------|---|
| Apoyeque | <i>A. cf. citrinellus</i> | AMCK01041 | N | F         | head | body | jaw | x | GU016977 | x |
| Apoyeque | <i>A. cf. citrinellus</i> | AMCK01042 | N | M         | head | body | jaw | x | GU016978 | x |
| Apoyeque | <i>A. cf. citrinellus</i> | AMCK01043 | N | M         | head | body | jaw | x | GU016979 | x |
| Apoyeque | <i>A. cf. citrinellus</i> | AMCK01044 | N | F         | head | body | jaw | x | GU016980 | x |
| Apoyeque | <i>A. cf. citrinellus</i> | AMCK01045 | N | J         |      |      |     | x | GU016981 | x |
| Apoyeque | <i>A. cf. citrinellus</i> | AMCK01046 | L | J         |      |      |     | x | GU016982 | x |
| Apoyeque | <i>A. cf. citrinellus</i> | AMCK01047 | N | M         | head | body | jaw | x | GU016983 | x |
| Apoyeque | <i>A. cf. citrinellus</i> | AMCK01048 | N | F         | head | body | jaw | x | GU016984 | x |
| Apoyeque | <i>A. cf. citrinellus</i> | AMCK01049 | L | F         | head | body | jaw | x | GU016985 | x |
| Apoyeque | <i>A. cf. citrinellus</i> | AMCK01050 | N | M         |      |      |     | x | GU016986 | x |
| Apoyeque | <i>A. cf. citrinellus</i> | AMCK01051 | N | not noted |      |      |     | x | GU016987 | x |
| Apoyeque | <i>A. cf. citrinellus</i> | AMCK01052 | L | F         | head | body | jaw | x | GU016988 | x |
| Apoyeque | <i>A. cf. citrinellus</i> | AMCK01053 | N | not noted |      |      |     | x | GU016989 | x |
| Apoyeque | <i>A. cf. citrinellus</i> | AMCK01054 | N | M         | head | body | jaw | x | GU016990 | x |
| Apoyeque | <i>A. cf. citrinellus</i> | AMCK01055 | N | F         |      |      |     | x | GU016991 | x |
| Apoyeque | <i>A. cf. citrinellus</i> | AMCK01056 | N | J         |      |      |     | x |          |   |
| Apoyeque | <i>A. cf. citrinellus</i> | AMCK01057 | N | not noted |      |      |     | x | GU016992 | x |
| Apoyeque | <i>A. cf. citrinellus</i> | AMCK01058 | N | not noted |      |      |     | x | GU016993 | x |
| Xiloa    | <i>A. amarillo</i>        | AMCK00001 |   | not noted |      |      |     |   |          | x |
| Xiloa    | <i>A. amarillo</i>        | AMCK00018 |   | not noted |      |      |     |   |          | x |
| Xiloa    | <i>A. amarillo</i>        | AMCK00019 |   | not noted |      |      |     |   |          | x |
| Xiloa    | <i>A. amarillo</i>        | AMCK00020 |   | not noted |      |      |     |   |          | x |
| Xiloa    | <i>A. amarillo</i>        | AMCK00021 |   | not noted |      |      |     |   |          | x |
| Xiloa    | <i>A. amarillo</i>        | AMCK00022 |   | not noted |      |      |     |   |          | x |
| Xiloa    | <i>A. amarillo</i>        | AMCK00023 |   | not noted |      |      |     |   |          | x |
| Xiloa    | <i>A. amarillo</i>        | AMCK00024 |   | not noted |      |      |     |   |          | x |
| Xiloa    | <i>A. amarillo</i>        | AMCK00025 |   | not noted |      |      |     |   |          | x |
| Xiloa    | <i>A. amarillo</i>        | AMCK00026 |   | not noted |      |      |     |   |          | x |
| Xiloa    | <i>A. amarillo</i>        | AMCK00027 |   | not noted |      |      |     |   |          | x |
| Xiloa    | <i>A. amarillo</i>        | AMCK00028 |   | not noted |      |      |     |   |          | x |

|       |                           |           |           |          |   |
|-------|---------------------------|-----------|-----------|----------|---|
| Xiloa | <i>A. amarillo</i>        | AMCK00029 | not noted |          | x |
| Xiloa | <i>A. cf. citrinellus</i> | AMCK00030 | J         |          | x |
| Xiloa | <i>A. amarillo</i>        | AMCK00534 | not noted | GU017062 | x |
| Xiloa | <i>A. amarillo</i>        | AMCK00863 | not noted | GU017063 | x |
| Xiloa | <i>A. amarillo</i>        | AMCK00864 | not noted | GU017064 | x |
| Xiloa | <i>A. amarillo</i>        | AMCK00865 | not noted | GU017065 | x |
| Xiloa | <i>A. cf. citrinellus</i> | AMCK00867 | J         | GU017090 | x |
| Xiloa | <i>A. amarillo</i>        | AMCK00868 | not noted | GU017066 | x |
| Xiloa | <i>A. sagittae</i>        | AMCK00878 | not noted |          | x |
| Xiloa | <i>A. amarillo</i>        | AMCK00886 | not noted | GU017067 | x |
| Xiloa | <i>A. amarillo</i>        | AMCK00890 | not noted | GU017068 | x |
| Xiloa | <i>A. xiloaensis</i>      | AMCK00891 | not noted | GU017080 | x |
| Xiloa | <i>A. xiloaensis</i>      | AMCK00892 | not noted | GU017081 | x |
| Xiloa | <i>A. xiloaensis</i>      | AMCK00893 | not noted | GU017082 | x |
| Xiloa | <i>A. xiloaensis</i>      | AMCK00894 | not noted | GU017083 | x |
| Xiloa | <i>A. xiloaensis</i>      | AMCK00895 | not noted |          | x |
| Xiloa | <i>A. xiloaensis</i>      | AMCK00896 | not noted | GU017084 | x |
| Xiloa | <i>A. xiloaensis</i>      | AMCK00897 | not noted | GU017085 | x |
| Xiloa | <i>A. xiloaensis</i>      | AMCK00898 | not noted | GU017086 | x |
| Xiloa | <i>A. amarillo</i>        | AMCK00900 | not noted | GU017069 | x |
| Xiloa | <i>A. xiloaensis</i>      | AMCK00902 | not noted | GU017079 | x |
| Xiloa | <i>A. amarillo</i>        | AMCK00905 | not noted | GU017070 | x |
| Xiloa | <i>A. amarillo</i>        | AMCK00908 | not noted |          | x |
| Xiloa | <i>A. amarillo</i>        | AMCK00911 | not noted | GU017071 | x |
| Xiloa | <i>A. xiloaensis</i>      | AMCK00916 | not noted | GU017087 | x |
| Xiloa | <i>A. cf. citrinellus</i> | AMCK00924 | J         | GU017088 | x |
| Xiloa | <i>A. cf. citrinellus</i> | AMCK00925 | J         | GU017089 | x |
| Xiloa | <i>A. amarillo</i>        | AMCK00930 | not noted | GU017072 | x |
| Xiloa | <i>A. amarillo</i>        | AMCK01244 | not noted |          | x |
| Xiloa | <i>A. amarillo</i>        | AMCK01247 | not noted |          | x |

|         |                       |           |           |          |   |
|---------|-----------------------|-----------|-----------|----------|---|
| Xiloa   | <i>A. amarillo</i>    | AMCK01251 | not noted | GU017073 | x |
| Xiloa   | <i>A. amarillo</i>    | AMCK01253 | not noted | GU017074 | x |
| Xiloa   | <i>A. amarillo</i>    | AMCK01254 | not noted |          | x |
| Xiloa   | <i>A. amarillo</i>    | AMCK01255 | not noted | GU017075 | x |
| Xiloa   | <i>A. amarillo</i>    | AMCK01256 | not noted | GU017076 | x |
| Xiloa   | <i>A. amarillo</i>    | AMCK01257 | not noted | GU017077 | x |
| Xiloa   | <i>A. amarillo</i>    | AMCK01258 | not noted |          | x |
| Xiloa   | <i>A. amarillo</i>    | AMCK01259 | not noted | GU017078 | x |
| Managua | <i>A. citrinellus</i> | 03022     | not noted |          | x |
| Managua | <i>A. citrinellus</i> | 03023     | not noted |          | x |
| Managua | <i>A. citrinellus</i> | 03024     | not noted |          | x |
| Managua | <i>A. citrinellus</i> | 03025     | not noted |          | x |
| Managua | <i>A. citrinellus</i> | 03026     | not noted |          | x |
| Managua | <i>A. citrinellus</i> | 03027     | not noted |          | x |
| Managua | <i>A. citrinellus</i> | 03028     | not noted |          | x |
| Managua | <i>A. citrinellus</i> | 03029     | not noted |          | x |
| Managua | <i>A. citrinellus</i> | 03030     | not noted |          | x |
| Managua | <i>A. citrinellus</i> | 03031     | not noted |          | x |
| Managua | <i>A. citrinellus</i> | 03032     | not noted |          | x |
| Managua | <i>A. citrinellus</i> | 03033     | not noted |          | x |
| Managua | <i>A. citrinellus</i> | 03034     | not noted |          | x |
| Managua | <i>A. citrinellus</i> | 03035     | not noted |          | x |
| Managua | <i>A. citrinellus</i> | 03036     | not noted |          | x |
| Managua | <i>A. citrinellus</i> | 03037     | not noted |          | x |
| Managua | <i>A. citrinellus</i> | 03038     | not noted |          | x |
| Managua | <i>A. citrinellus</i> | 03039     | not noted |          | x |
| Managua | <i>A. citrinellus</i> | 03040     | not noted |          | x |
| Managua | <i>A. citrinellus</i> | 03041     | not noted |          | x |
| Managua | <i>A. citrinellus</i> | 03042     | not noted |          | x |
| Managua | <i>A. citrinellus</i> | 03043     | not noted |          | x |

|         |                       |       |           |   |
|---------|-----------------------|-------|-----------|---|
| Managua | <i>A. citrinellus</i> | 03044 | not noted | X |
| Managua | <i>A. citrinellus</i> | 03045 | not noted | X |
| Managua | <i>A. citrinellus</i> | 03046 | not noted | X |
| Managua | <i>A. citrinellus</i> | 03047 | not noted | X |
| Managua | <i>A. citrinellus</i> | 03048 | not noted | X |
| Managua | <i>A. citrinellus</i> | 03049 | not noted | X |
| Managua | <i>A. citrinellus</i> | 03050 | not noted | X |
| Managua | <i>A. citrinellus</i> | 03051 | not noted | X |
| Managua | <i>A. citrinellus</i> | 03052 | not noted | X |
| Managua | <i>A. citrinellus</i> | 03053 | not noted | X |
| Managua | <i>A. citrinellus</i> | 03054 | not noted | X |
| Managua | <i>A. citrinellus</i> | 03055 | not noted | X |
| Managua | <i>A. citrinellus</i> | 03056 | not noted | X |
| Managua | <i>A. citrinellus</i> | 03057 | not noted | X |
| Managua | <i>A. citrinellus</i> | 03058 | not noted | X |
| Managua | <i>A. citrinellus</i> | 03059 | not noted | X |
| Managua | <i>A. citrinellus</i> | 03060 | not noted | X |
| Managua | <i>A. citrinellus</i> | 03061 | not noted | X |
| Managua | <i>A. citrinellus</i> | 03062 | not noted | X |
| Managua | <i>A. citrinellus</i> | 03063 | not noted | X |
| Managua | <i>A. citrinellus</i> | 03064 | not noted | X |
| Managua | <i>A. citrinellus</i> | 03066 | not noted | X |
| Managua | <i>A. citrinellus</i> | 03067 | not noted | X |
| Managua | <i>A. citrinellus</i> | 03068 | not noted | X |
| Managua | <i>A. citrinellus</i> | 03069 | not noted | X |
| Managua | <i>A. citrinellus</i> | 03070 | not noted | X |
| Managua | <i>A. citrinellus</i> | 03071 | not noted | X |
| Managua | <i>A. citrinellus</i> | 03072 | not noted | X |
| Managua | <i>A. citrinellus</i> | 03073 | not noted | X |
| Managua | <i>A. citrinellus</i> | 03074 | not noted | X |

|         |                       |       |           |   |
|---------|-----------------------|-------|-----------|---|
| Managua | <i>A. citrinellus</i> | 03075 | not noted | X |
| Managua | <i>A. citrinellus</i> | 03924 | not noted | X |
| Managua | <i>A. citrinellus</i> | 03925 | not noted | X |
| Managua | <i>A. citrinellus</i> | 03926 | not noted | X |
| Managua | <i>A. citrinellus</i> | 03927 | not noted | X |
| Managua | <i>A. citrinellus</i> | 03928 | not noted | X |
| Managua | <i>A. citrinellus</i> | 03929 | not noted | X |
| Managua | <i>A. citrinellus</i> | 05001 | not noted | X |
| Managua | <i>A. labiatus</i>    | 05002 | not noted | X |
| Managua | <i>A. labiatus</i>    | 05249 | not noted | X |
| Managua | <i>A. labiatus</i>    | 05250 | not noted | X |
| Managua | <i>A. labiatus</i>    | 05251 | not noted | X |
| Managua | <i>A. citrinellus</i> | 05333 | not noted | X |
| Managua | <i>A. citrinellus</i> | 05334 | not noted | X |
| Managua | <i>A. citrinellus</i> | 05335 | not noted | X |
| Managua | <i>A. labiatus</i>    | 05598 | not noted | X |
| Managua | <i>A. labiatus</i>    | 05599 | not noted | X |
| Managua | <i>A. labiatus</i>    | 05600 | not noted | X |
| Managua | <i>A. labiatus</i>    | 05601 | not noted | X |
| Managua | <i>A. labiatus</i>    | 05602 | not noted | X |
| Managua | <i>A. labiatus</i>    | 05603 | not noted | X |
| Managua | <i>A. labiatus</i>    | 05604 | not noted | X |
| Managua | <i>A. labiatus</i>    | 05605 | not noted | X |
| Managua | <i>A. labiatus</i>    | 05606 | not noted | X |
| Managua | <i>A. labiatus</i>    | 05607 | not noted | X |
| Managua | <i>A. labiatus</i>    | 05814 | not noted | X |
| Managua | <i>A. labiatus</i>    | 05815 | not noted | X |
| Managua | <i>A. labiatus</i>    | 05816 | not noted | X |
| Managua | <i>A. labiatus</i>    | 05817 | not noted | X |
| Managua | <i>A. labiatus</i>    | 05818 | not noted | X |

|         |                       |         |           |          |   |
|---------|-----------------------|---------|-----------|----------|---|
| Managua | <i>A. labiatus</i>    | 05819   | not noted |          | x |
| Managua | <i>A. labiatus</i>    | 05820   | not noted |          | x |
| Managua | <i>A. labiatus</i>    | 05821   | not noted |          | x |
| Managua | <i>A. labiatus</i>    | 05822   | not noted |          | x |
| Managua | <i>A. labiatus</i>    | 05823   | not noted |          | x |
| Managua | <i>A. labiatus</i>    | 05824   | not noted |          | x |
| Managua | <i>A. labiatus</i>    | 05825   | not noted |          | x |
| Managua | <i>A. labiatus</i>    | 05826   | not noted |          | x |
| Managua | <i>A. labiatus</i>    | 05827   | not noted |          | x |
| Managua | <i>A. labiatus</i>    | 05828   | not noted |          | x |
| Managua | <i>A. citrinellus</i> | 03 0001 | not noted | HM183496 | x |
| Managua | <i>A. citrinellus</i> | 03 0002 | not noted | HM183497 | x |
| Managua | <i>A. citrinellus</i> | 03 0003 | not noted | HM183498 | x |
| Managua | <i>A. citrinellus</i> | 03 0004 | not noted |          | x |
| Managua | <i>A. citrinellus</i> | 03 0006 | not noted | HM183501 | x |
| Managua | <i>A. citrinellus</i> | 03 0007 | not noted | HM183502 | x |
| Managua | <i>A. citrinellus</i> | 03 0008 | not noted |          | x |
| Managua | <i>A. citrinellus</i> | 03 0009 | not noted | HM183504 | x |
| Managua | <i>A. citrinellus</i> | 03 0010 | not noted |          | x |
| Managua | <i>A. citrinellus</i> | 03 0011 | not noted | HM183506 | x |
| Managua | <i>A. citrinellus</i> | 03 0012 | not noted | HM183507 | x |
| Managua | <i>A. citrinellus</i> | 03 0013 | not noted | HM183508 | x |
| Managua | <i>A. citrinellus</i> | 03 0014 | not noted | HM183509 | x |
| Managua | <i>A. citrinellus</i> | 03 0015 | not noted | HM183509 | x |
| Managua | <i>A. citrinellus</i> | 03 0016 | not noted | HM183511 | x |
| Managua | <i>A. citrinellus</i> | 03 0017 | not noted | HM204814 | x |
| Managua | <i>A. citrinellus</i> | 03 0018 | not noted | HM183512 | x |
| Managua | <i>A. citrinellus</i> | 03 0019 | not noted | HM183513 | x |
| Managua | <i>A. citrinellus</i> | 03 0020 | not noted | HM183514 | x |
| Managua | <i>A. citrinellus</i> | 03 0021 | not noted | HM183515 | x |

|         |                       |         |           |          |   |
|---------|-----------------------|---------|-----------|----------|---|
| Managua | <i>A. citrinellus</i> | 03 0076 | not noted | HM183570 | x |
| Managua | <i>A. citrinellus</i> | 03 0077 | not noted | HM183571 | x |
| Managua | <i>A. citrinellus</i> | 03 0078 | not noted | HM183572 | x |
| Managua | <i>A. citrinellus</i> | 03 0079 | not noted | HM183573 | x |
| Managua | <i>A. citrinellus</i> | 03 0080 | not noted | HM183574 | x |
| Managua | <i>A. citrinellus</i> | 03 0081 | not noted | HM183575 | x |
| Managua | <i>A. citrinellus</i> | 03 0082 | not noted | HM183576 | x |
| Managua | <i>A. citrinellus</i> | 03 0083 | not noted | HM183577 | x |
| Managua | <i>A. citrinellus</i> | 03 0084 | not noted | HM183578 | x |
| Managua | <i>A. citrinellus</i> | 03 0085 | not noted |          | x |
| Managua | <i>A. citrinellus</i> | 03 0930 | not noted | HM184423 | x |
| Managua | <i>A. citrinellus</i> | 03 0931 | not noted | HM184424 | x |
| Managua | <i>A. citrinellus</i> | 03 0933 | not noted | HM184426 | x |
| Managua | <i>A. citrinellus</i> | 03 0934 | not noted | HM184427 | x |
| Managua | <i>A. citrinellus</i> | 03 0935 | not noted | HM204815 | x |
| Managua | <i>A. citrinellus</i> | 03 0936 | not noted | HM184429 | x |
| Managua | <i>A. citrinellus</i> | 03 0937 | not noted |          | x |
| Managua | <i>A. citrinellus</i> | 03 0938 | not noted |          | x |
| Managua | <i>A. citrinellus</i> | 03 0939 | not noted | HM184432 | x |
| Managua | <i>A. citrinellus</i> | 03 0940 | not noted |          | x |
| Managua | <i>A. citrinellus</i> | 03 0941 | not noted | HM184434 | x |
| Managua | <i>A. citrinellus</i> | 03 0942 | not noted | HM184435 | x |
| Managua | <i>A. citrinellus</i> | 03 0943 | not noted | HM184436 | x |
| Managua | <i>A. citrinellus</i> | 03 0944 | not noted | HM184437 | x |
| Managua | <i>A. citrinellus</i> | 03 0945 | not noted | HM184438 | x |
| Managua | <i>A. citrinellus</i> | 03 0946 | not noted | HM184439 | x |
| Managua | <i>A. citrinellus</i> | 03 0947 | not noted | HM184440 | x |
| Managua | <i>A. citrinellus</i> | 03 0948 | not noted |          | x |
| Managua | <i>A. citrinellus</i> | 03 0949 | not noted | HM184442 | x |
| Managua | <i>A. citrinellus</i> | 03 0950 | not noted |          | x |

|         |                       |         |           |          |   |
|---------|-----------------------|---------|-----------|----------|---|
| Managua | <i>A. citrinellus</i> | 03 0951 | not noted | HM184444 | x |
| Managua | <i>A. citrinellus</i> | 03 0952 | not noted | HM184445 | x |
| Managua | <i>A. citrinellus</i> | 03 0953 | not noted |          | x |
| Managua | <i>A. citrinellus</i> | 03 0954 | not noted | HM184447 | x |
| Managua | <i>A. citrinellus</i> | 03 0955 | not noted | HM184448 | x |
| Managua | <i>A. citrinellus</i> | 03 0956 | not noted | HM184449 | x |
| Managua | <i>A. citrinellus</i> | 03 0957 | not noted | HM184450 | x |
| Managua | <i>A. citrinellus</i> | 03 0958 | not noted | HM184451 | x |
| Managua | <i>A. citrinellus</i> | 03 0959 | not noted | HM184452 | x |
| Managua | <i>A. labiatus</i>    | 03 1067 | not noted |          | x |
| Managua | <i>A. labiatus</i>    | 03 1068 | not noted | HM184561 | x |
| Managua | <i>A. labiatus</i>    | 03 1069 | not noted | HM184562 | x |
| Managua | <i>A. citrinellus</i> | 436     | not noted | HM204816 | x |
| Managua | <i>A. citrinellus</i> | 447     | not noted |          | x |
| Managua | <i>A. citrinellus</i> | 448     | not noted | AY567337 | x |
| Managua | <i>A. citrinellus</i> | 473     | not noted |          | x |
| Managua | <i>A. citrinellus</i> | 474     | not noted |          | x |
| Managua | <i>A. citrinellus</i> | 475     | not noted |          | x |
| Managua | <i>A. citrinellus</i> | 476     | not noted |          | x |
| Managua | <i>A. citrinellus</i> | 477     | not noted | HM204817 | x |
| Managua | <i>A. citrinellus</i> | 478     | not noted |          | x |
| Managua | <i>A. citrinellus</i> | 479     | not noted | AY567361 | x |
| Managua | <i>A. citrinellus</i> | 480     | not noted | HM204818 | x |
| Managua | <i>A. citrinellus</i> | 481     | not noted | AY567362 | x |
| Managua | <i>A. citrinellus</i> | 482     | not noted | AY567363 | x |
| Managua | <i>A. citrinellus</i> | 484     | not noted | HM204819 | x |
| Managua | <i>A. citrinellus</i> | 485     | not noted | HM204820 | x |
| Managua | <i>A. citrinellus</i> | 486     | not noted | HM204821 | x |
| Managua | <i>A. citrinellus</i> | 487     | not noted | AY567364 | x |
| Managua | <i>A. citrinellus</i> | 488     | not noted |          | x |

|         |                       |     |           |          |   |
|---------|-----------------------|-----|-----------|----------|---|
| Managua | <i>A. citrinellus</i> | 489 | not noted | AY567366 | x |
| Managua | <i>A. citrinellus</i> | 490 | not noted | AY567367 | x |
| Managua | <i>A. citrinellus</i> | 491 | not noted | AY567368 | x |
| Managua | <i>A. citrinellus</i> | 492 | not noted | AY567369 | x |
| Managua | <i>A. citrinellus</i> | 493 | not noted | AY567370 | x |
| Managua | <i>A. citrinellus</i> | 494 | not noted |          | x |
| Managua | <i>A. citrinellus</i> | 495 | not noted |          | x |
| Managua | <i>A. citrinellus</i> | 496 | not noted |          | x |
| Managua | <i>A. citrinellus</i> | 497 | not noted |          | x |
| Managua | <i>A. citrinellus</i> | 498 | not noted |          | x |
| Managua | <i>A. citrinellus</i> | 499 | not noted | HM204822 | x |
| Managua | <i>A. citrinellus</i> | 500 | not noted | AY567374 | x |
| Managua | <i>A. citrinellus</i> | 501 | not noted | AY567375 | x |
