# Supplementary material for: Rapid sympatric ecological differentiation of crater lake cichlid fishes within historic times
Source: PubMed Central journal article supplement (PMC2880021; doi:10.1186/1741-7007-8-60), 2010-05-12
Supplement: 1741-7007-8-60-S6.pdf [file 1741-7007-8-60-S6.pdf]

**Additional File 6: Standard length of mature Midas cichlids in Apoyeque by lip morphology and sex.**

Body size, measured as standard length, did not differ between thin- and thick-lipped individuals (Two factor ANOVA, morph effect,  $F_{1,202} = 0.652$ ,  $p = 0.42$ ). Males were significantly larger than females (sex effect,  $F_{1,202} = 19.9$ ,  $p < 0.001$ ) for both morphs (morph  $\times$  sex interaction,  $F_{1,202} = 0.082$ ,  $p = 0.78$ ).

| Lip morph    | Sex | <i>N</i> | Mean length (cm) $\pm$ standard error |
|--------------|-----|----------|---------------------------------------|
| thick-lipped | ♀   | 24       | 9.3 $\pm$ 1.8                         |
| thick-lipped | ♂   | 15       | 10.5 $\pm$ 5.0                        |
| thin-lipped  | ♀   | 82       | 9.5 $\pm$ 1.1                         |
| thin-lipped  | ♂   | 85       | 10.8 $\pm$ 2.1                        |
