# Supplementary material for: Rapid sympatric ecological differentiation of crater lake cichlid fishes within historic times
Source: PubMed Central journal article supplement (PMC2880021; doi:10.1186/1741-7007-8-60), 2010-05-12

**Additional File 7: Bivariate analysis of lip size by body length (mm), fitted with quadratic line for thin- and thick-lipped fishes.**

A plot of lip size (total lip area, mm<sup>2</sup>) by body length (standard length, mm) with quadratic lines of best-fit shows the different relationship of lip and body size in each of the morphs (n = 309 thin-lipped, n = 71 thick-lipped). A quadratic line (df = 2) had improved goodness-of-fit to the data over a linear (df = 1) regression (thin-lipped: adjusted  $R^2 = 0.705$  vs. 0.672, thick-lipped: adjusted  $R^2$  0.506 vs. 0.461; non-transformed data).

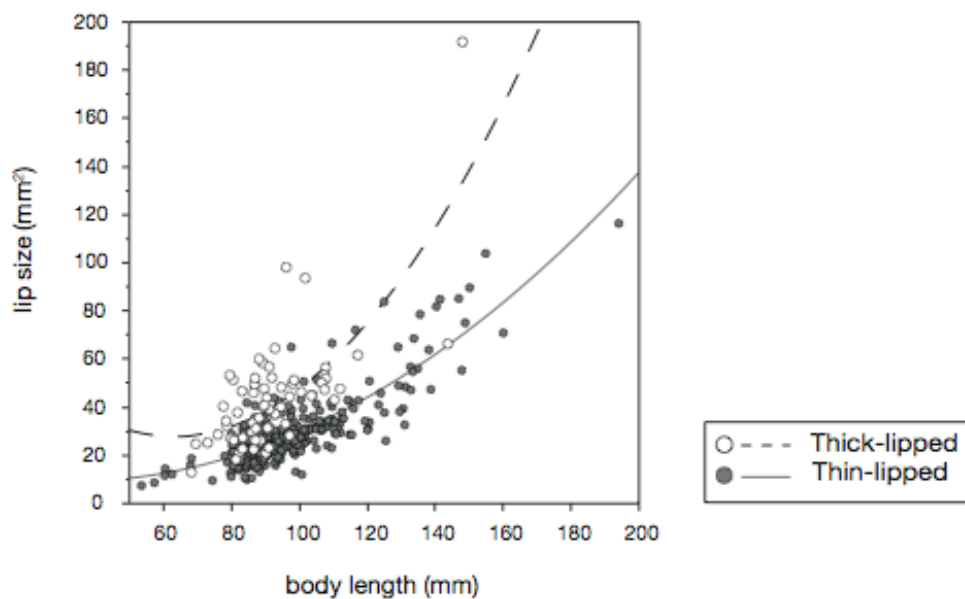

Supplement: 1741-7007-8-60-S7.pdf [file 1741-7007-8-60-S7.pdf]
