# Supplementary material for: Rapid sympatric ecological differentiation of crater lake cichlid fishes within historic times
Source: PubMed Central journal article supplement (PMC2880021; doi:10.1186/1741-7007-8-60), 2010-05-12

A) Lip size

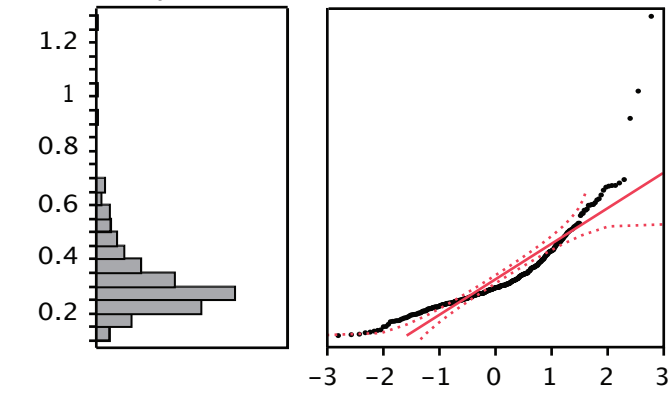

D) Diet

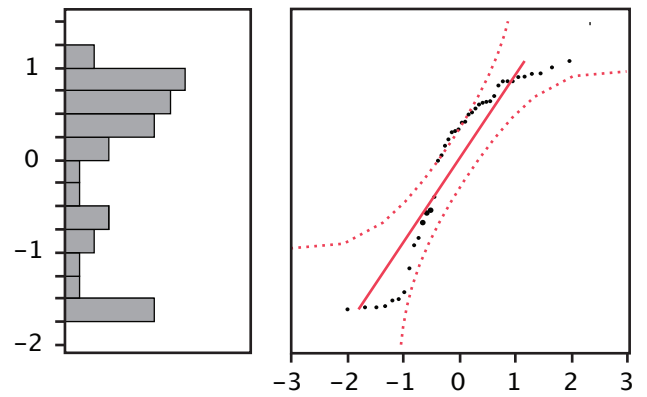

B) Body shape

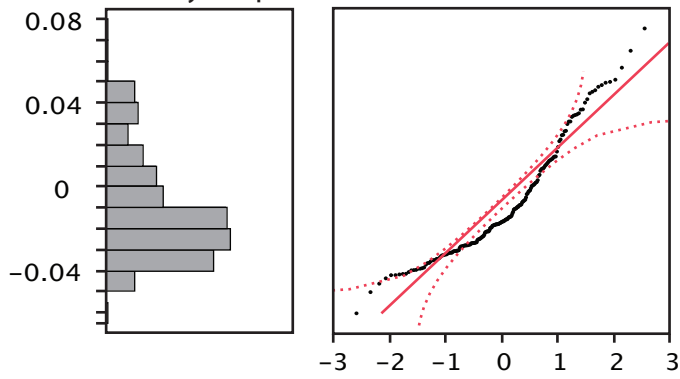

E)  $\delta^{13}\text{C}$

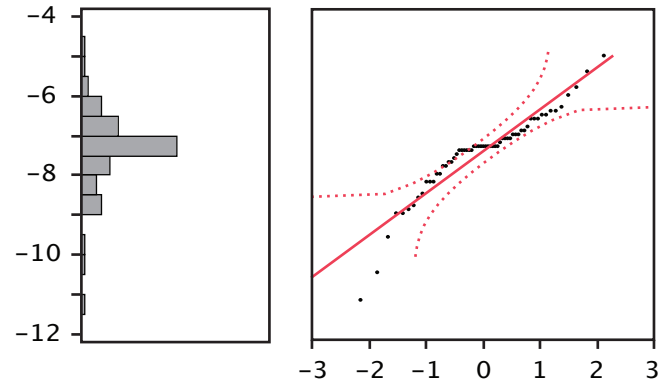

C) Pharyngeal jaws

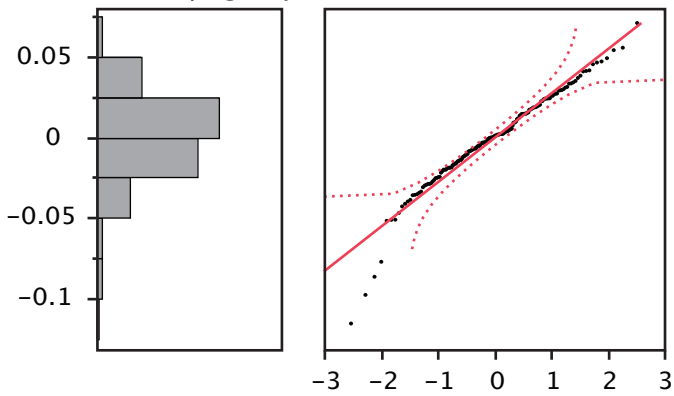

F)  $\delta^{15}\text{N}$

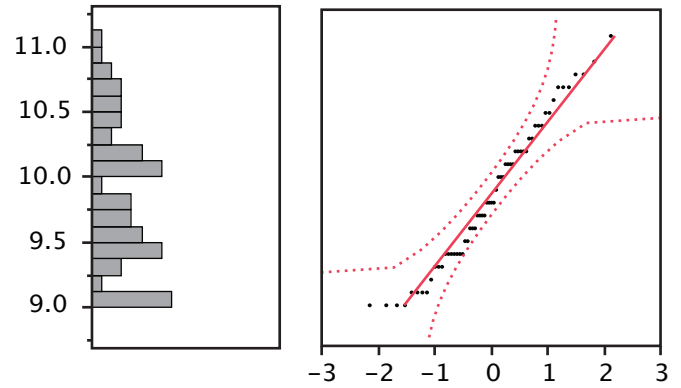

Supplement: 1741-7007-8-60-S8.pdf [file 1741-7007-8-60-S8.pdf]
